# Supplementary material for: Basal Ganglia Surface Morphology and the Effects of Stimulant Medications in Youth With Attention Deficit Hyperactivity Disorder
Source: Atypon-hosted journal article supplement (doi:10.1176/appi.ajp.2010.09091259), 2010-07-02

# Diagnosis Main Effect (No Depression)

## CAUDATE

## PUTAMEN

## GLOBUS PALLIDUS

Uncorrected  
Left Right

GRF-Corrected  
Left Right

Uncorrected  
Left Right

GRF-Corrected  
Left Right

Uncorrected  
Left Right

GRF-Corrected  
Left Right

Anterior

Lateral

Posterior

Medial

Dorsal

Ventral

L

L

L

L

L

L

P

P

P

P

P

P

M

M

M

M

M

M

A

A

A

A

A

A

A

A

A

A

A

A

< 0.0001

0.025

0.05

0.05

0.025

< 0.0001

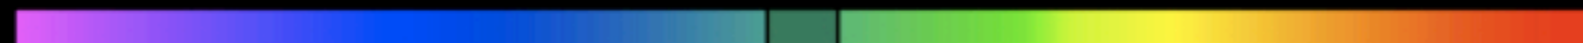

Supplement: ajp_167_08_977_03.pdf [file ajp_167_08_977_03.pdf]
