# Supplementary material for: Basal Ganglia Surface Morphology and the Effects of Stimulant Medications in Youth With Attention Deficit Hyperactivity Disorder
Source: Atypon-hosted journal article supplement (doi:10.1176/appi.ajp.2010.09091259), 2010-07-02

# Diagnosis Main Effect (No Specific Developmental Disorder)

## CAUDATE

## PUTAMEN

## GLOBUS PALLIDUS

Uncorrected  
Left Right

GRF-Corrected  
Left Right

Uncorrected  
Left Right

GRF-Corrected  
Left Right

Uncorrected  
Left Right

GRF-Corrected  
Left Right

Anterior

Lateral

Posterior

Medial

Dorsal

Ventral

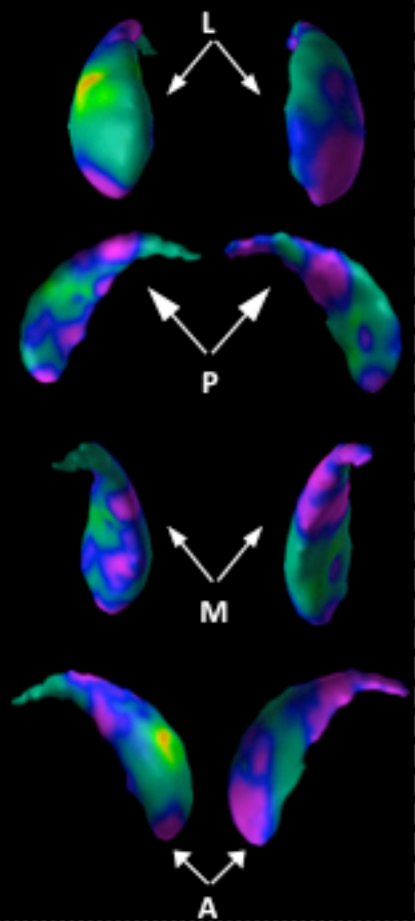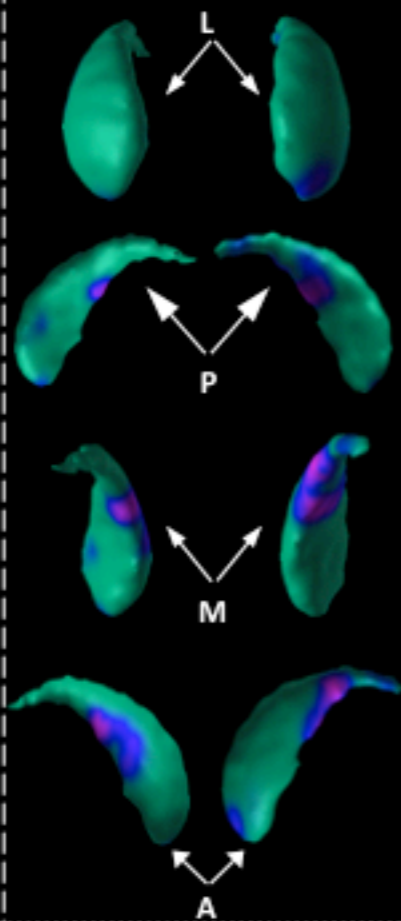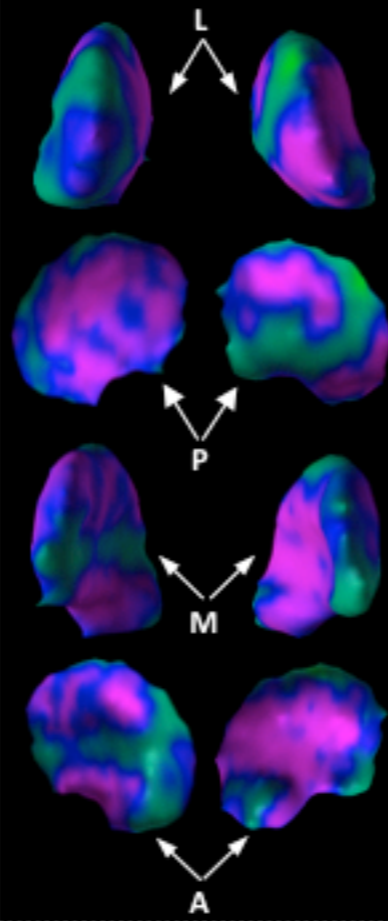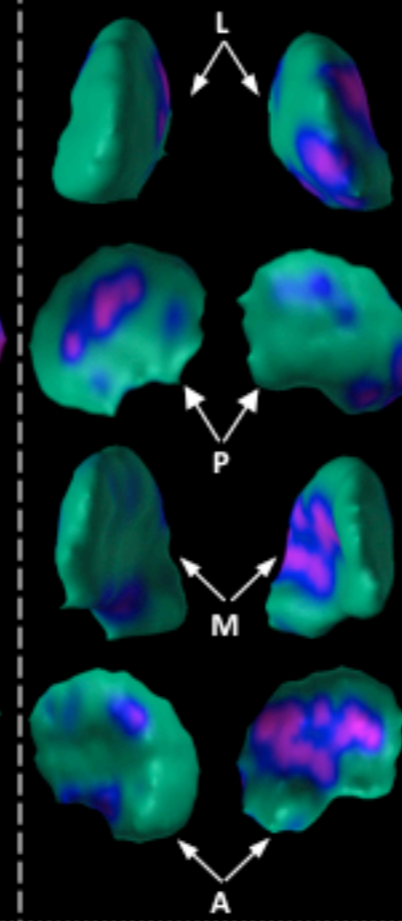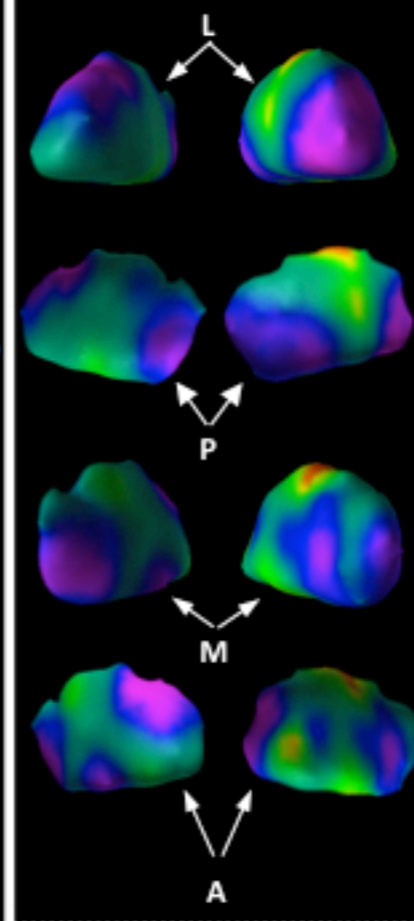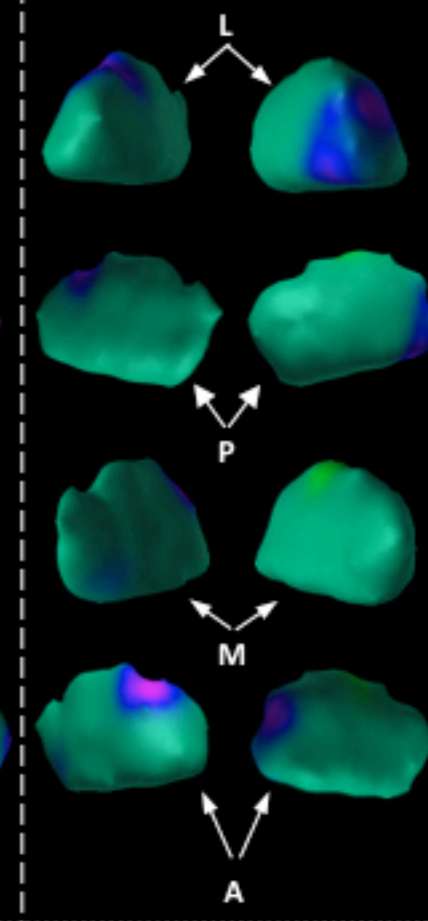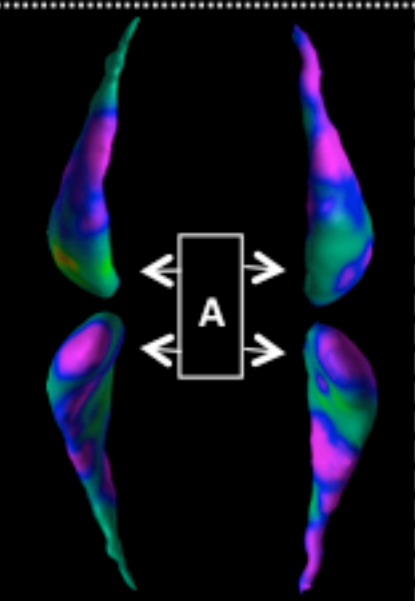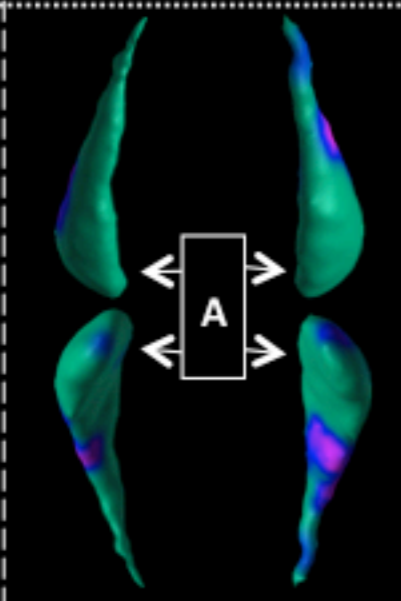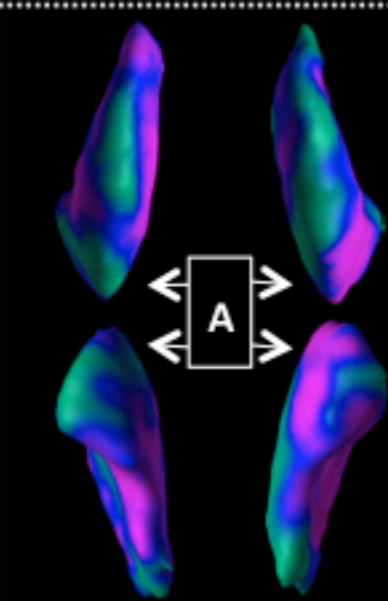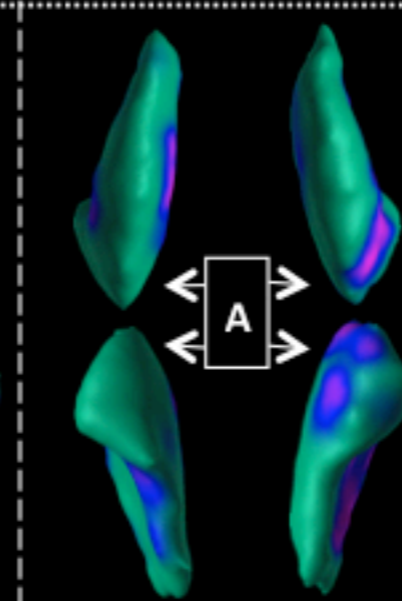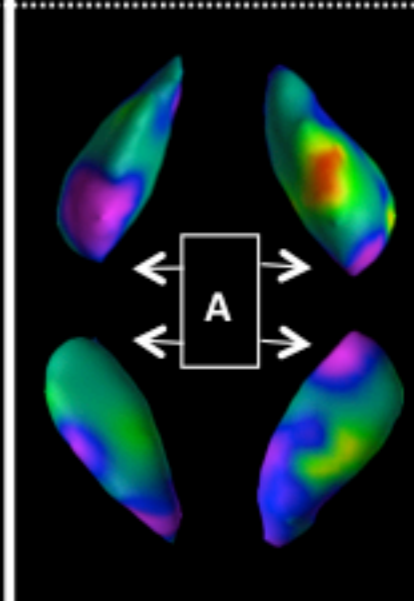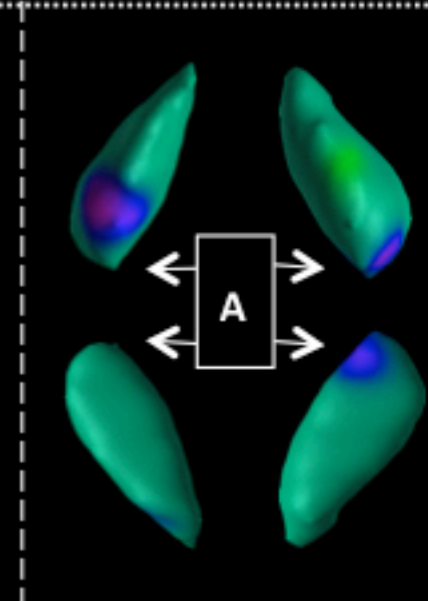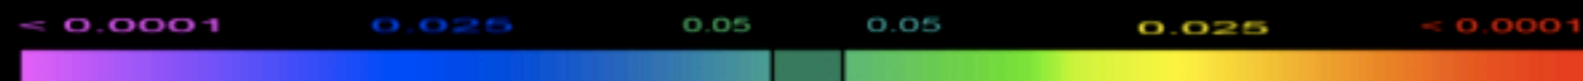

Supplement: ajp_167_08_977_05.pdf [file ajp_167_08_977_05.pdf]
