# Supplementary figures and images for: Basal Ganglia Surface Morphology and the Effects of Stimulant Medications in Youth With Attention Deficit Hyperactivity Disorder
Source: Atypon-hosted journal article supplement (doi:10.1176/appi.ajp.2010.09091259), 2010-07-02

# Diagnosis Main Effect (No Oppositional Defiant Disorder)

## CAUDATE

## PUTAMEN

## GLOBUS PALLIDUS

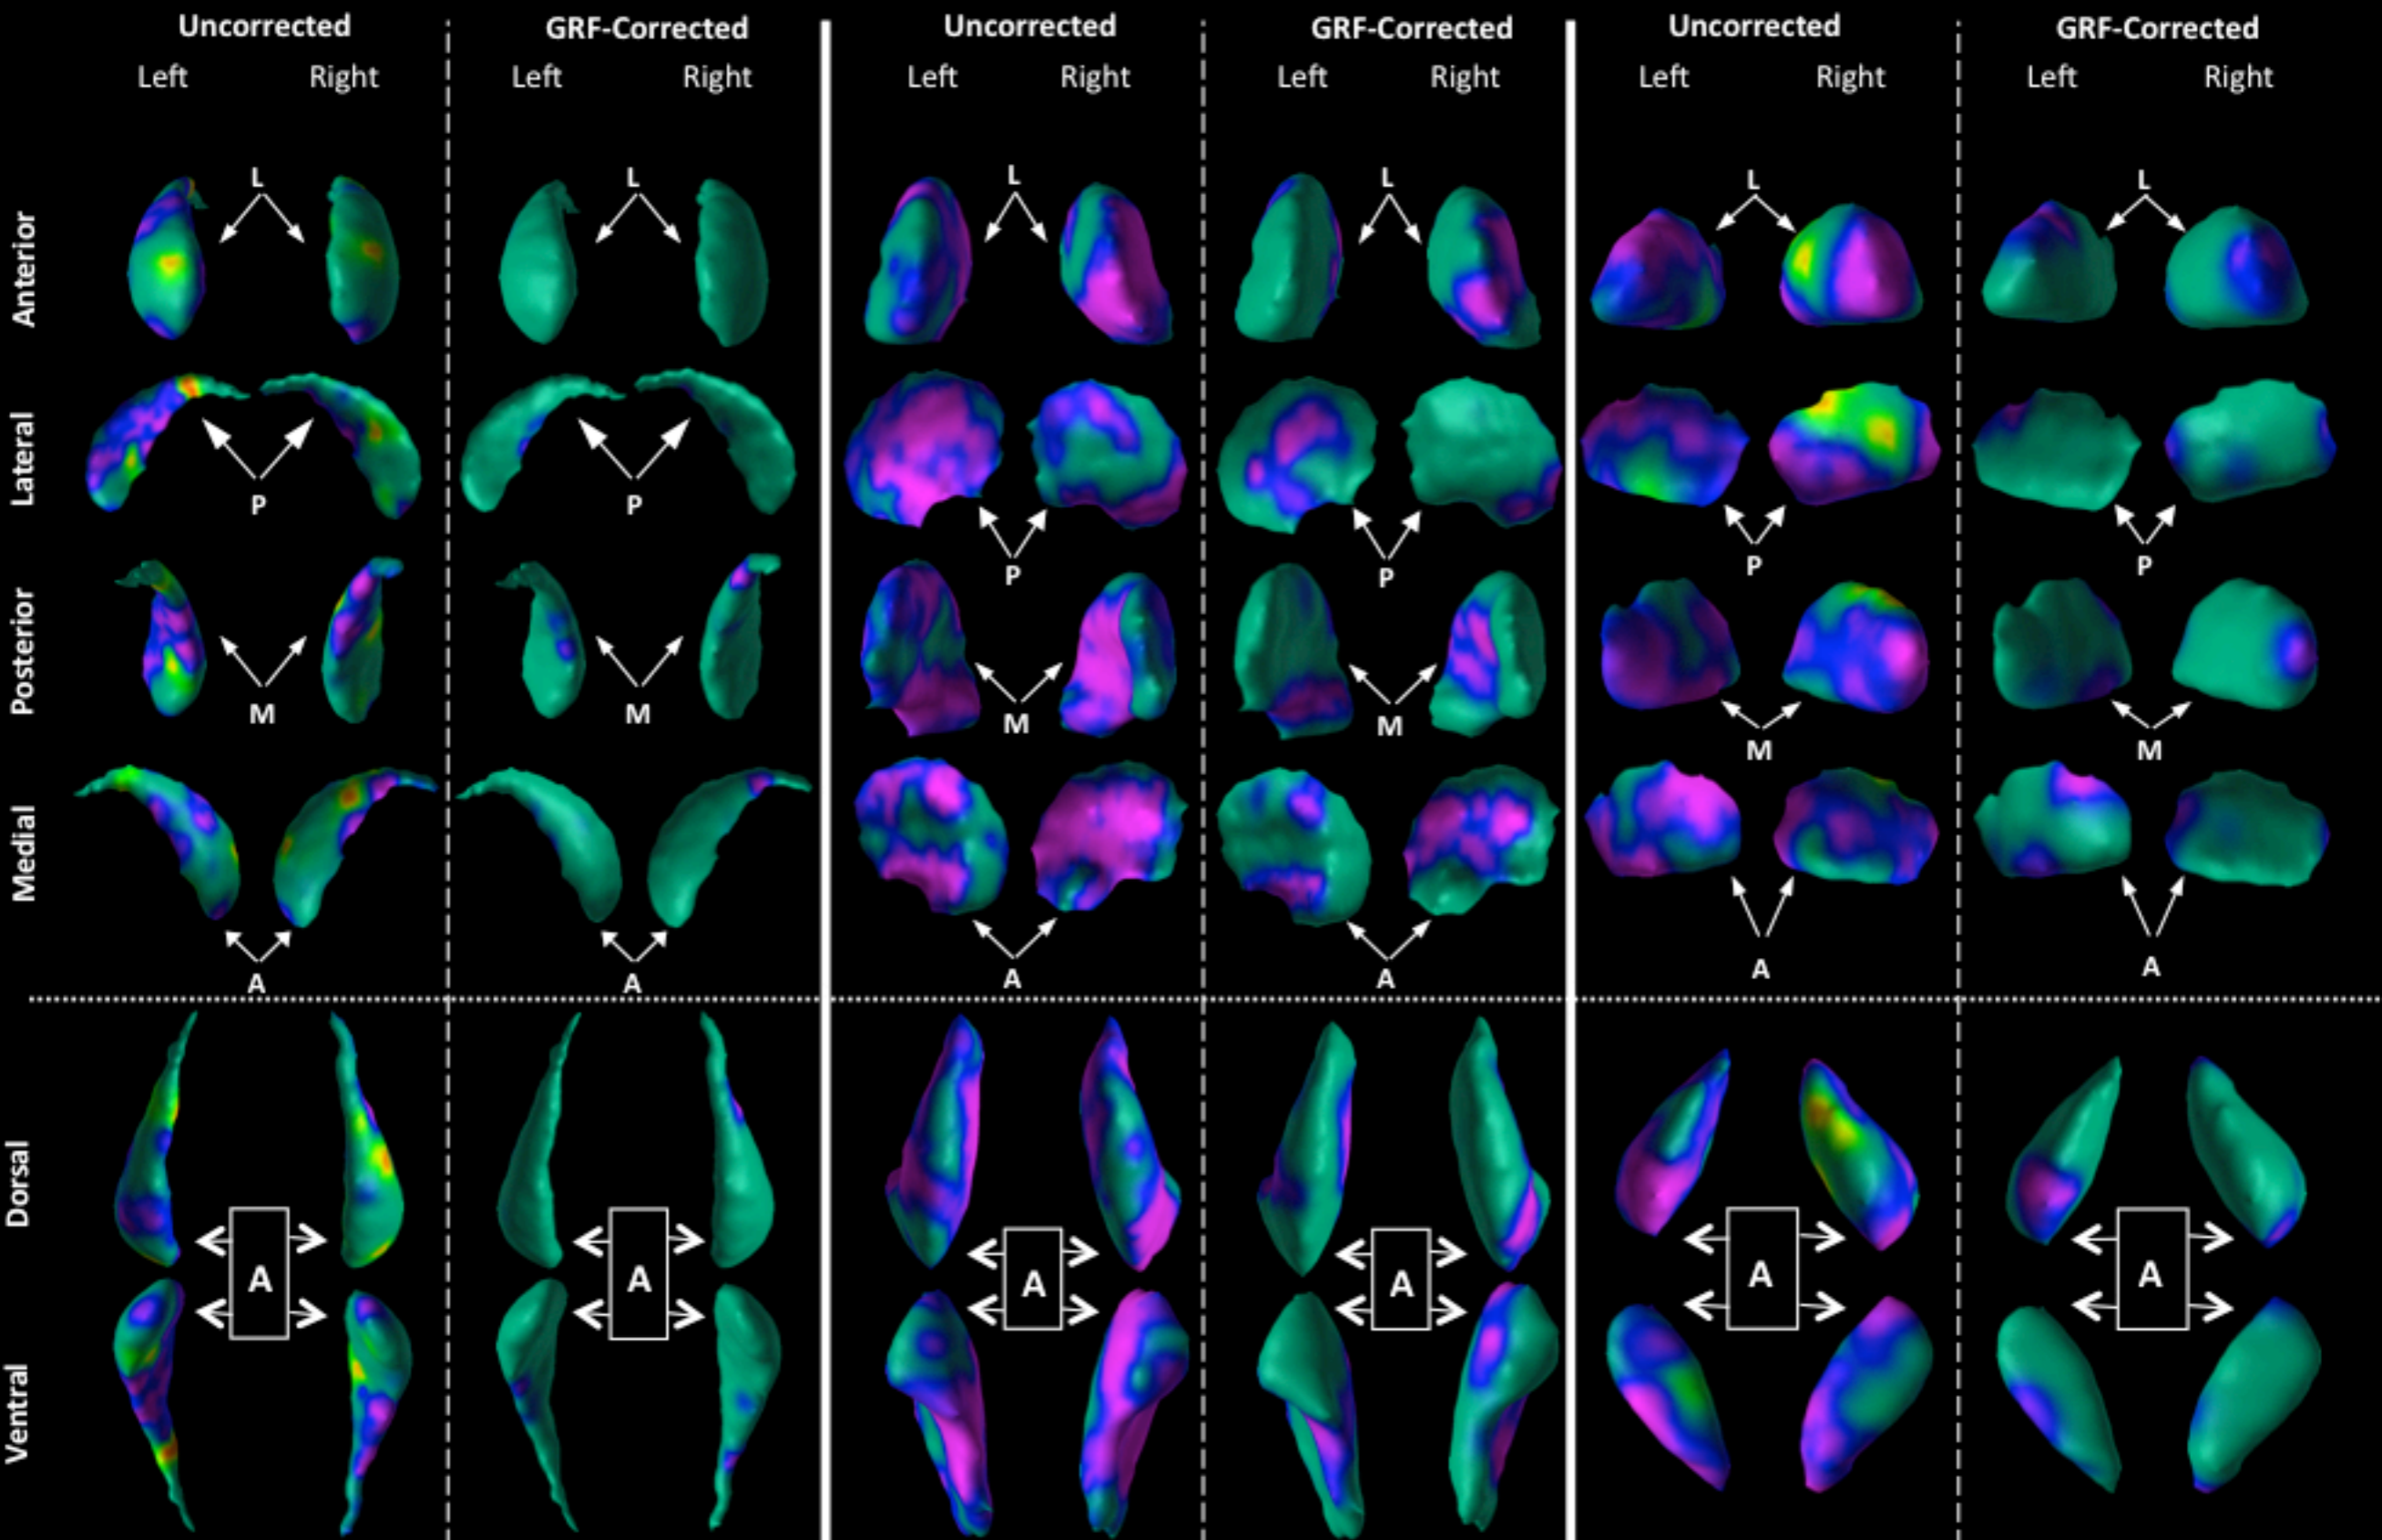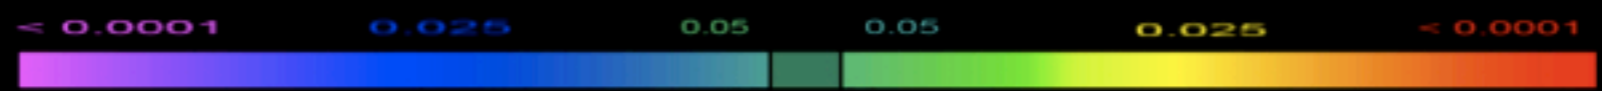

Supplement: ajp_167_08_977_04.pdf [file ajp_167_08_977_04.pdf]

A

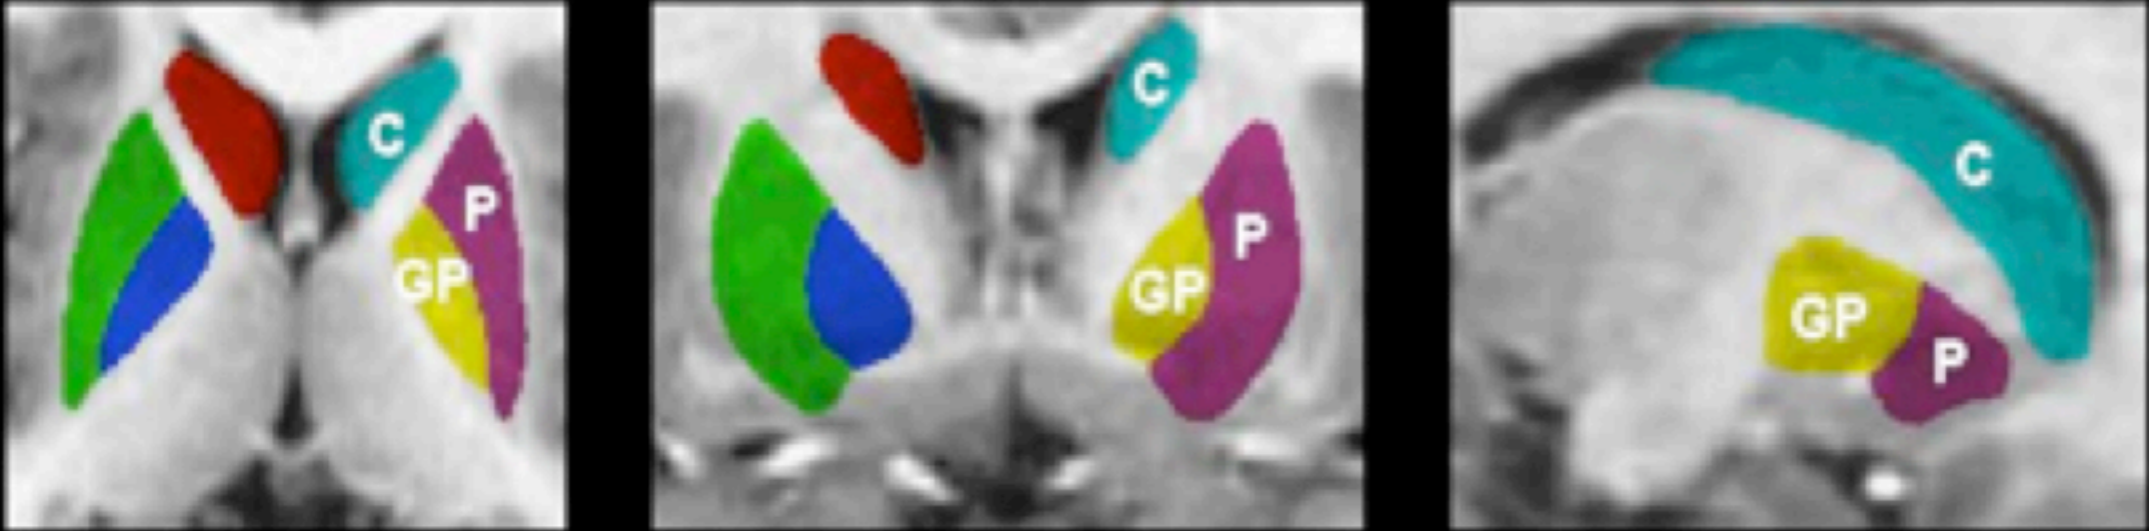

B

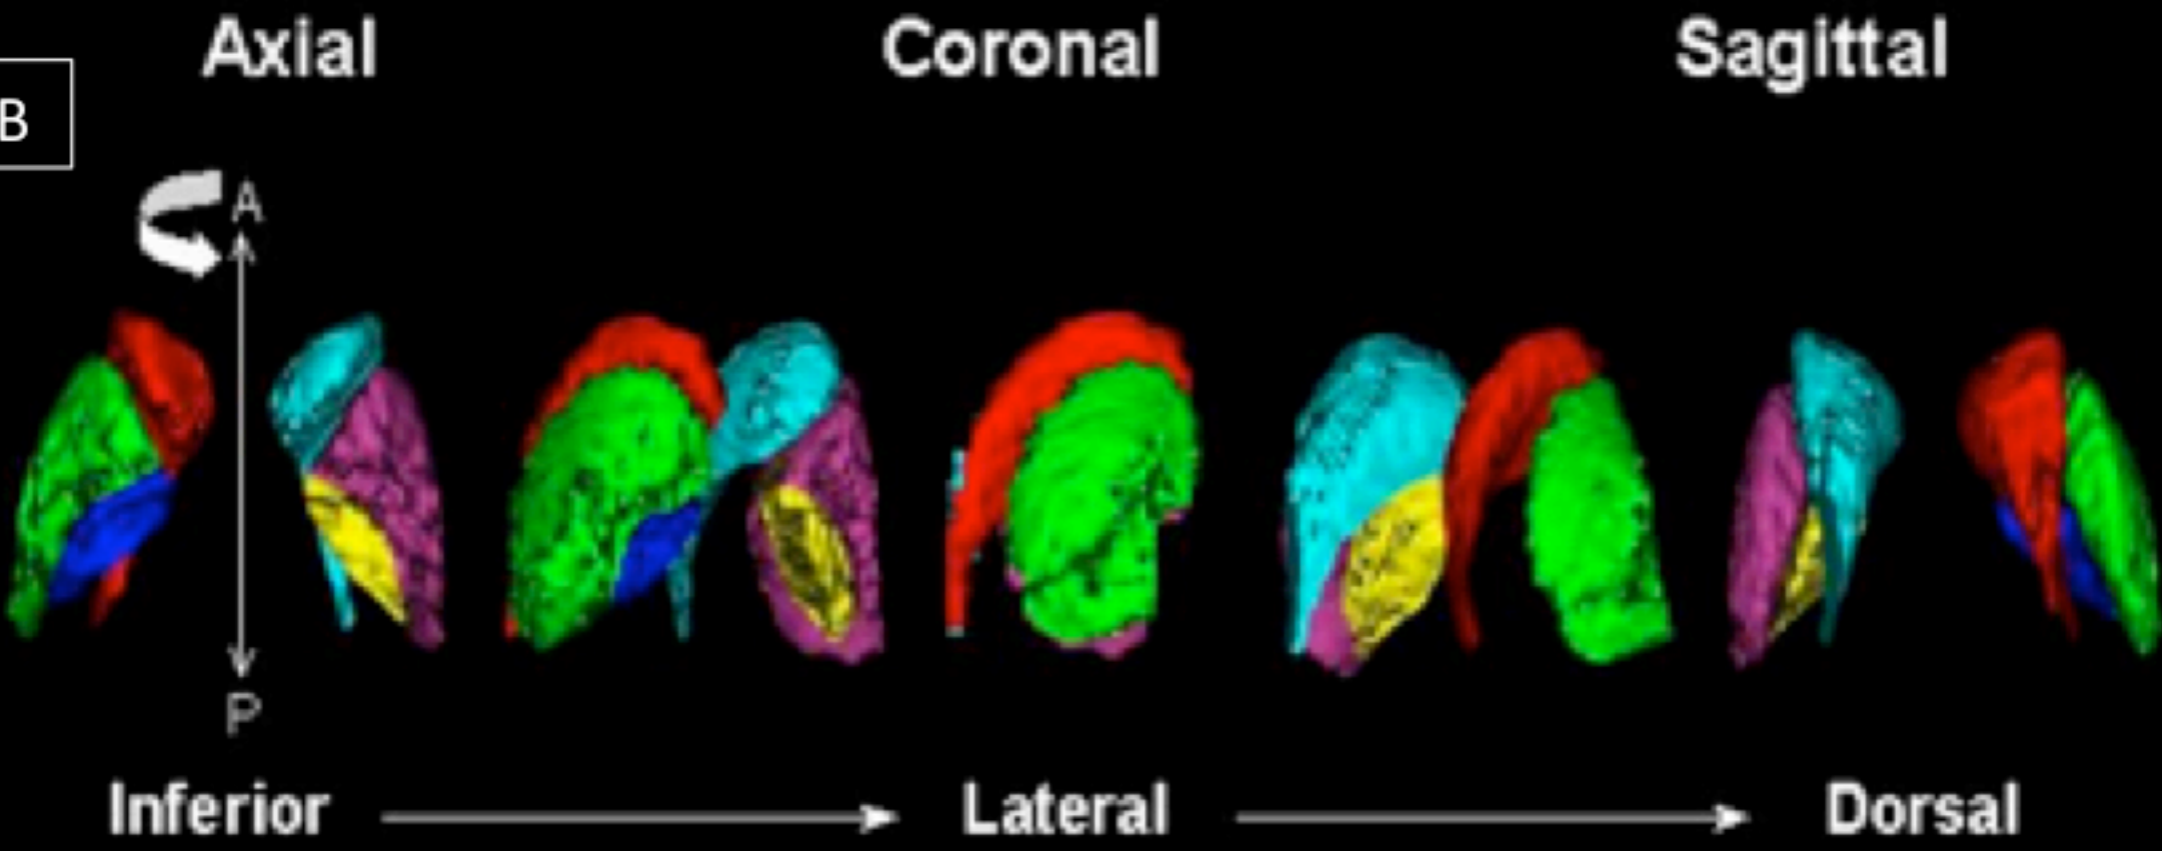

Supplement: ajp_167_08_977_02.pdf [file ajp_167_08_977_02.pdf]
